# Supplementary material for: Hierarchical assemblies of SnS microflowers and Ni 3 S 2 nanofibers grown in situ on nickel foam for highly efficient capture of iodine vapor
Source: Royal Society of Chemistry journal article supplement (doi:10.1039/d5qi02241j), 2025-12-11
Supplement: d5qi02241j1.pdf [file d5qi02241j1.pdf]

## Supplementary Information

### **Hierarchical assembly of SnS micro flowers and Ni<sub>3</sub>S<sub>2</sub> nanofibers in situ grown on nickel foam for highly efficient capture of iodine vapor**

Chang Miao,<sup>†a</sup> Wu Li,<sup>†a</sup> Xuyang Min,<sup>a,1</sup> Guangu Hu,<sup>a,2</sup> Chaonan Wang,<sup>a</sup> Bo Qiao,<sup>a</sup>

Senkai Han,<sup>a</sup> Shulan Ma,<sup>\*a</sup> and Huiqin Yao<sup>\*b</sup>

*<sup>a</sup>College of Chemistry, Beijing Normal University, Beijing 100875, China. E-mail:*

*mashulan@bnu.edu.cn*

*<sup>b</sup>School of Basic Medical Sciences, Ningxia Medical University, Yinchuan 750004,*

*China. E-mail: [huiqin\\_yao@163.com](mailto:huiqin_yao@163.com)*

<sup>†</sup>These authors contributed equally.

<sup>1</sup>*Present address: Beijing 21st century school, Beijing 100142, China.*

<sup>2</sup>*Present address: Shanghai Pinghe School, Shanghai 200120, China.*

## 1. Materials

Nickel foam (NF, Shenzhen Tianchenghe Technology Co., Ltd., thickness is 1.6 mm, density is  $0.45\text{ g}\cdot\text{cm}^{-3}$ ), tin (IV) chloride pentahydrate ( $\text{SnCl}_4\cdot 5\text{H}_2\text{O}$ , Shanghai Macklin Biochemical Co., Ltd., 99.0%), thioacetamide ( $\text{CH}_3\text{CSNH}_2$ , Shanghai Macklin Biochemical Co., Ltd., 99.0%), iodine ( $\text{I}_2$ , Shanghai Macklin Biochemical Co., Ltd., 99.99%), acetone ( $\text{CH}_3\text{COCH}_3$ , Beijing Tongguang Fine Chemicals Company, AR), muriatic acid ( $\text{HCl}$ , Beijing Tongguang Fine Chemicals Company, GR), ethanol ( $\text{C}_2\text{H}_5\text{OH}$ , Tianjin Dingshengxin Chemical Reagent Co., Ltd., AR).

All of the reagents and materials were purchased commercially and used without any further purification.

## 2. Treatment of nickel foam (NF)

First, a large piece of NF (size:  $50\times 6\text{ cm}^2$ ) was cut into many small pieces with the size of  $1\times 2\text{ cm}^2$ . These NF pieces were put into 1 M  $\text{HCl}$  (about 200 mL) with ultrasonic treatment for 30 min to remove the surface oxide layer and acid-soluble impurities. At this point, the solution turned slightly green (with  $\text{Ni}^{2+}$  being partially released into the acidic solution), and then NF pieces were repeatedly washed with deionized water until  $\text{pH} = 7$ . It was then ultrasonically cleaned 30 min in acetone and ethanol in sequence, and vacuum-dried for later use.

## 3. Characterization techniques

X-ray diffraction (XRD) was used to characterize the crystal structures of the as-prepared products and I-loaded samples (X'pert pro MPD diffractometer,  $\text{Cu K}\alpha$  radiation,  $\lambda = 0.15406\text{ nm}$ , operation at 40 kV and 40 mA). Field emission scanning electron microscope (FESEM) was used to observe morphologies and microstructures of samples (SU-8010, Hitachi, 10 kV). High-resolution transmission electron microscope (HRTEM) was used to observe the microstructures (JEM-2010, JEOL and FEI Technai G2 F20, 200 kV). X-ray photoelectron spectroscopy (XPS) was used to investigate the elemental valence and chemical environment of the products (ESCALAB 250Xi spectrometer, Thermo Fisher,  $\text{Al K}\alpha$  radiation). Microscopic confocal Raman spectrometer (Raman) was used to analyze chemical bonds of the samples (LabRAM Aramis, Horiba Jobin Yvon, He-Ne laser,  $\lambda = 633\text{ nm}$ ). Inductively

coupled plasma-atomic emission spectrometry (ICP-AES) was used to quantitatively analyze the chemical compositions of products (Jarrel-ASH, ICAP-9000). Thermogravimetric (TG) analysis was performed to study the thermal stability of samples (HITACHI STA200, N<sub>2</sub> atmosphere, 10 °C/min).

#### 4. Calculations of chemical composition of 0.6-SnS/Ni<sub>3</sub>S<sub>2</sub>/NF

We used an indirect calculation method to determine the specific chemical composition of the 0.6-SnS/Ni<sub>3</sub>S<sub>2</sub>/NF sample. Initially, the mass of bare NF was measured to be 72.3 mg (0.0723 g). After the solvothermal reaction, the mass of the sample increased to 77.3 mg (0.0773 g), indicating a mass increase of 5 mg (= 77.3-72.3), which is attributed to the introduction of Sn (of SnS) and S (of SnS and Ni<sub>3</sub>S<sub>2</sub>). In order to quantify the components in the sample, 2.7 mg (0.0027g) of the 0.6-SnS/Ni<sub>3</sub>S<sub>2</sub>/NF sample was dissolved completely in aqua regia and diluted to 50 mL, and 5 mL solution was taken for ICP tests. Based on the measured mass concentrations of Sn (0.63 mg/L) and Ni (40.1 mg/L), the mass percentages of Sn and Ni are determined to 1.17% (=0.63×0.05/2.7×100%) and 74.26% (= 40.1×0.05/2.7×100%).

For the 0.6-SnS/Ni<sub>3</sub>S<sub>2</sub>/NF sample with a mass of 77.3 mg, the contents of Sn and Ni would be 0.90 mg (= 77.3×1.17%) and 57.4 mg (= 77.3×74.26%), respectively. Combined with the total mass increase of 50 mg of Sn+S, the S content would be 5-0.90 = 4.1 mg.

If the chemical formula of 0.6-SnS/Ni<sub>3</sub>S<sub>2</sub>/NF is written as (SnS)<sub>x</sub>(Ni<sub>3</sub>S<sub>2</sub>)<sub>y</sub>(Ni)<sub>z</sub>, then there will be the following equations:

$$\text{S: } (x + 2y) \times 32 = 4.1$$

$$\text{Sn: } x \times 118.71 = 0.90$$

$$\text{Ni: } (3y+z) \times 58.69 = 57.4$$

Thus:

$$x = 0.0076, y = 0.0600, z = 0.7980$$

If fix the molar number of Ni to 1, the molar numbers of SnS and Ni<sub>3</sub>S<sub>2</sub> would be 0.0095 and 0.075, thus, the chemical composition of 0.6-SnS/Ni<sub>3</sub>S<sub>2</sub>/NF could be quantitatively expressed as (SnS)<sub>0.0095</sub>(Ni<sub>3</sub>S<sub>2</sub>)<sub>0.075</sub>(NF) with a molecular weight of 78.1.

**Table S1** Parameters for DFT calculations.

| Functional                               | $k$ -point sampling                 | Cutoff energy | whether vdW corrections were used |
|------------------------------------------|-------------------------------------|---------------|-----------------------------------|
| Perdew-Burke-Ernzerh of (PBE) functional | 2×2×1 for structural optimization   | 450 eV        | No                                |
|                                          | 3×3×3 for density of state          |               |                                   |
|                                          | 2×2×1 for charge density difference |               |                                   |

**Table S2** Binding energies of Ni<sub>3</sub>S<sub>2</sub>/NF, 0.6-SnS/Ni<sub>3</sub>S<sub>2</sub>/NF and 0.6-SnS/Ni<sub>3</sub>S<sub>2</sub>/NF-I.

| Samples                                      | Binding energies (eV) | Corresponding ions and orbitals                        |
|----------------------------------------------|-----------------------|--------------------------------------------------------|
| Ni <sub>3</sub> S <sub>2</sub> /NF           | 873.5/855.6           | 2p of Ni <sup>2+</sup>                                 |
|                                              | 870.4/853.0           | 2p of Ni <sup>0</sup>                                  |
|                                              | 163.7/162.7           | 2p of S <sup>2-</sup>                                  |
| 0.6-SnS/Ni <sub>3</sub> S <sub>2</sub> /NF   | 873.8/855.9           | 2p of Ni <sup>2+</sup>                                 |
|                                              | 870.4/853.0           | 2p of Ni <sup>0</sup>                                  |
|                                              | 163.0/162.0           | 2p of S <sup>2-</sup>                                  |
|                                              | 168.2                 | 2p of S <sup>6+</sup> (SO <sub>4</sub> <sup>2-</sup> ) |
|                                              | 494.8/486.4           | 3d of Sn <sup>2+</sup>                                 |
| 0.6-SnS/Ni <sub>3</sub> S <sub>2</sub> /NF-I | 874.0/856.0           | 2p of Ni <sup>2+</sup>                                 |
|                                              | 164.7/162.5           | 2p of S <sup>0</sup>                                   |
|                                              | 169.5                 | 2p of S <sup>6+</sup> (SO <sub>4</sub> <sup>2-</sup> ) |
|                                              | 495.6/487.2           | 3d of Sn <sup>4+</sup>                                 |
|                                              | 630.5/619.0           | 3d of I <sup>-</sup>                                   |
|                                              | 632.0/620.7           | 3d of I <sup>0</sup> (I <sub>2</sub> )                 |

**Table S3** The adsorption energy  $E_{ad}$  (eV), adsorption bond length ( $B$ , Å) and the I-I bond length ( $L$ , Å) of I<sub>2</sub> adsorbed on the composites.

|                              | SnS   | Ni <sub>3</sub> S <sub>2</sub> | SnS/Ni <sub>3</sub> S <sub>2</sub> | Ni <sub>3</sub> S <sub>2</sub> /SnS |
|------------------------------|-------|--------------------------------|------------------------------------|-------------------------------------|
| $E_{\text{ad}}$ (Metal site) | -2.94 | -4.67                          | -2.83                              | -3.23                               |
| $B_{M-I}$                    | 2.955 | 2.532, 2.539,<br>2.630         | 2.996                              | 2.540, 2.743,<br>2.769              |
| $L$                          | 2.858 | 3.057                          | 2.832                              | 2.962                               |
| $E_{\text{ad}}$ (S site)     | -2.86 | -4.26                          | -2.78                              | -2.65                               |
| $B_{S-I}$                    | 2.875 | 2.959                          | 2.932                              | 2.841                               |
| $L$                          | 2.795 | 2.760                          | 2.783                              | 2.780                               |

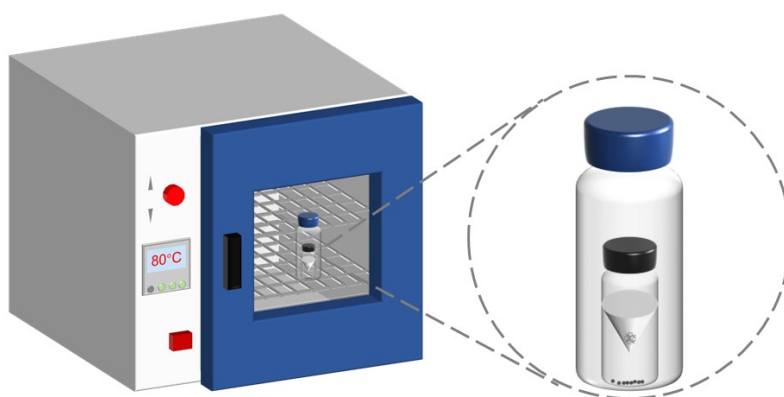

**Fig. S1** Schematic diagram of iodine adsorption experiment.

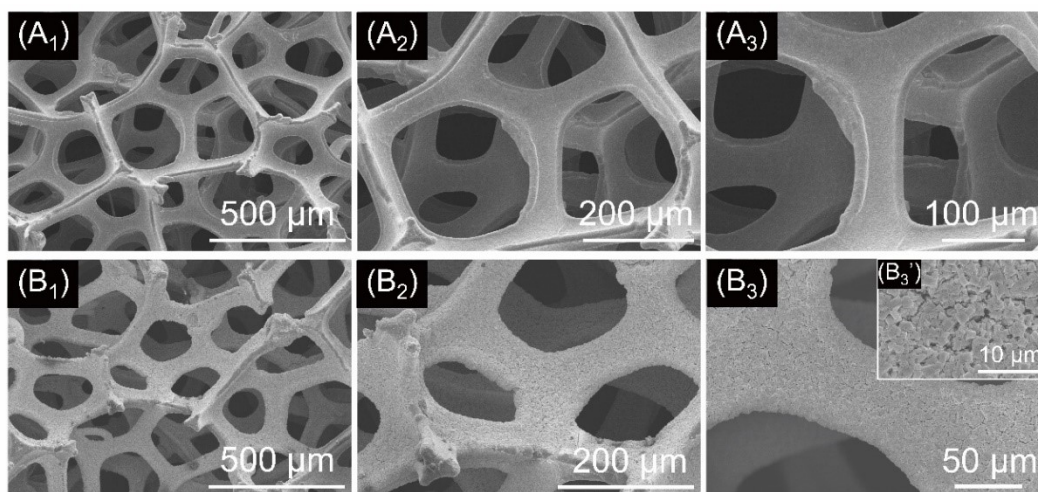

**Fig. S2** SEM images of (A<sub>1</sub>-A<sub>3</sub>) NF and (B<sub>1</sub>-B<sub>3</sub>) NF-I.

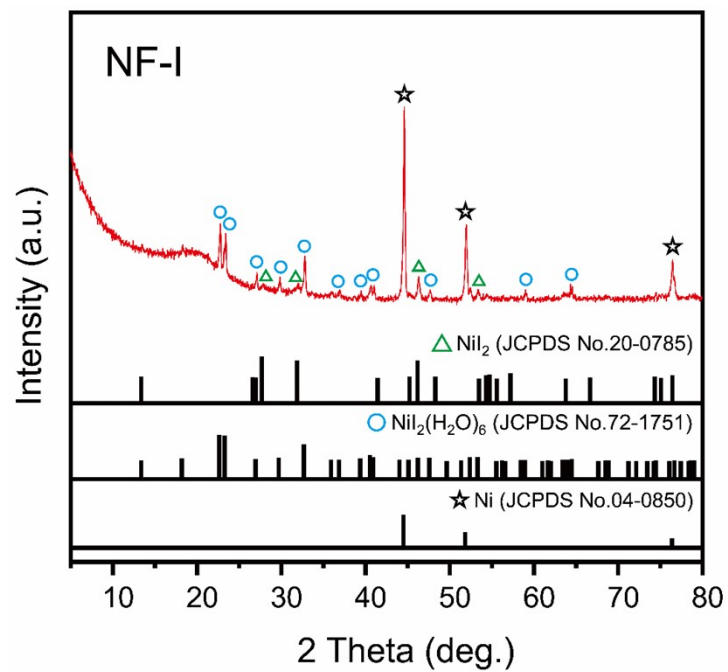

**Fig. S3** XRD pattern of the sample of NF-I.

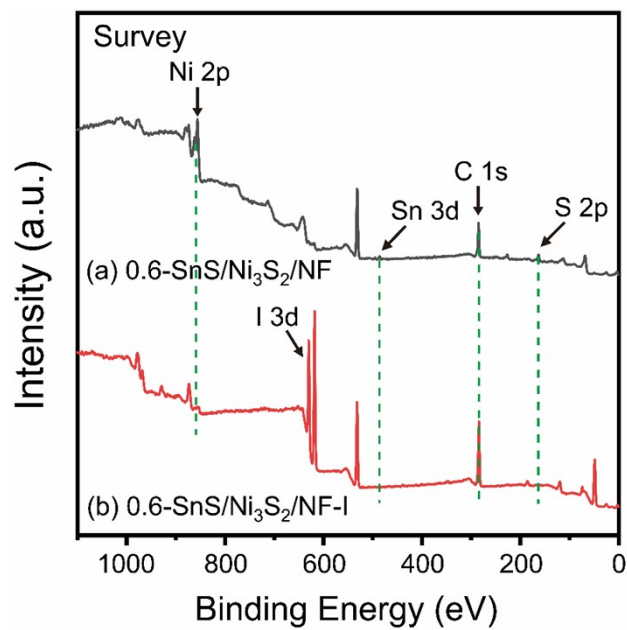

**Fig. S4** XPS survey spectra of (a) 0.6-SnS/ $\text{Ni}_3\text{S}_2$ /NF and (b) 0.6-SnS/ $\text{Ni}_3\text{S}_2$ /NF-I.

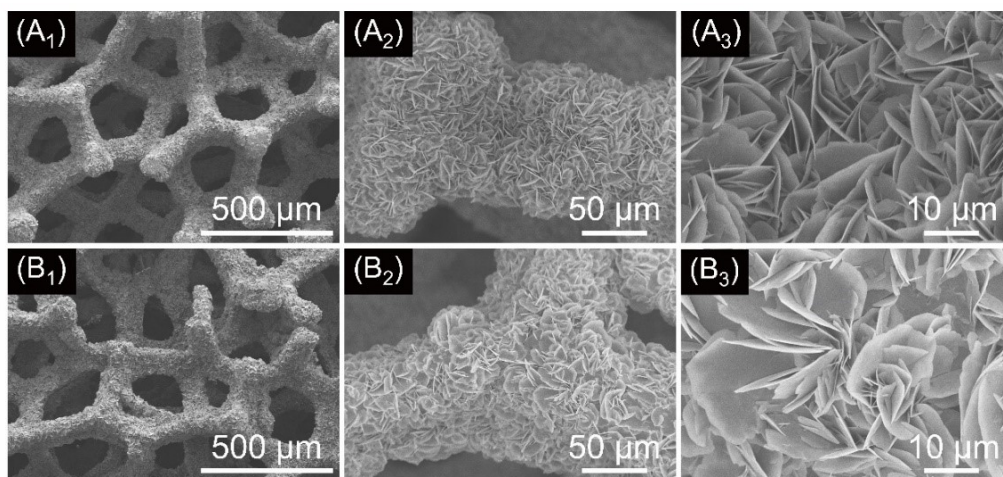

**Fig. S5** SEM images of I-loaded samples after (A<sub>1</sub>-A<sub>3</sub>) desorption (first-cycle) and (B<sub>1</sub>-B<sub>3</sub>) resorption (that is, second-cycle adsorption).

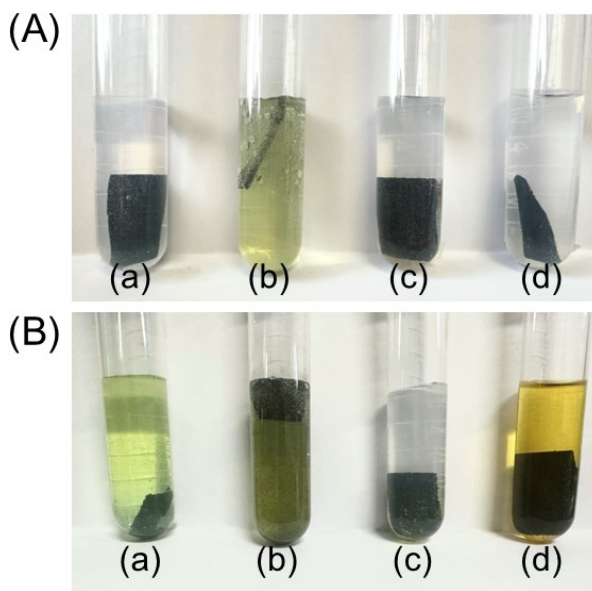

**Fig. S6** (A) Photographs of 0.6-SnS/Ni<sub>3</sub>S<sub>2</sub>/NF in (a) deionized water, (b) 12 M HCl, (c) saturated NaOH solution and (d) ethyl acetate; (B) Photographs of 0.6-SnS/Ni<sub>3</sub>S<sub>2</sub>/NF-I in (a) deionized water, (b) 12 M HCl, (c) saturated NaOH solution and (d) ethyl acetate.

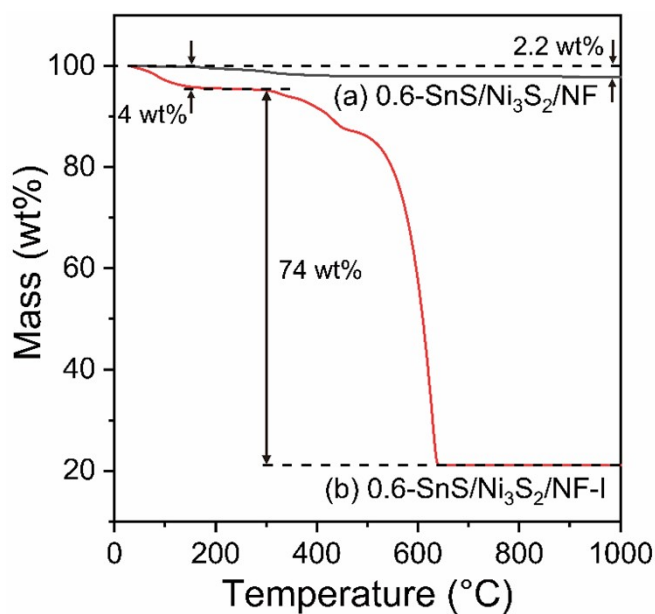

**Fig. S7** Thermogravimetric (TG) curves of (a) 0.6-SnS/Ni<sub>3</sub>S<sub>2</sub>/NF and (b) 0.6-SnS/Ni<sub>3</sub>S<sub>2</sub>/NF-I.

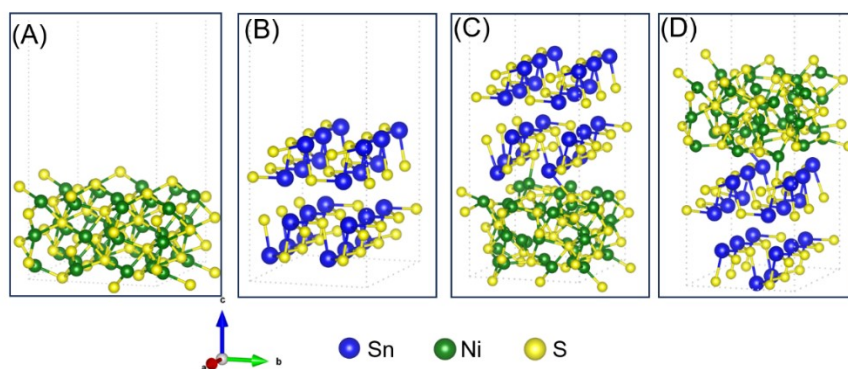

**Fig. S8** The optimized structural models of (A) Ni<sub>3</sub>S<sub>2</sub>, (B) SnS, (C) SnS/Ni<sub>3</sub>S<sub>2</sub> heterojunction (with SnS as sorption surface) and (D) Ni<sub>3</sub>S<sub>2</sub>/SnS heterojunction (with Ni<sub>3</sub>S<sub>2</sub> as sorption surface).

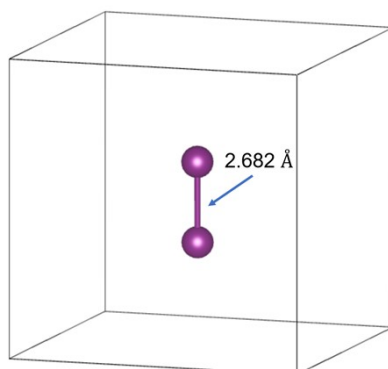

**Fig. S9** The optimized structural model of I<sub>2</sub> molecule.
